# Supplementary material for: A one-pot synthesis of AgBr/Ag3PO4 composite photocatalysts
Source: Royal Society of Chemistry journal article supplement (doi:10.1039/d0ra10265b), 2021-01-01
Supplement: d0ra10265b1.pdf [file d0ra10265b1.pdf]

## Supporting Information

### **One-pot synthesis of AgBr/Ag<sub>3</sub>PO<sub>4</sub> composite photocatalyst**

Yitao Fan<sup>1</sup>, Tao Liu<sup>1</sup>, Hongshuang Li<sup>1</sup>, Yu Yan<sup>2</sup>, Zhenyu Li<sup>1\*</sup>

1 School of Chemical Engineering, Changchun University of Technology,  
Changchun 130012, P. R. China.

2 Municipal Engineering Northeast Design and Research Institute  
Co.LTD, Changchun 130112, P. China.

\*Corresponding author: A/Prof. Zhenyu Li. [cclzy2001@163.com](mailto:cclzy2001@163.com)

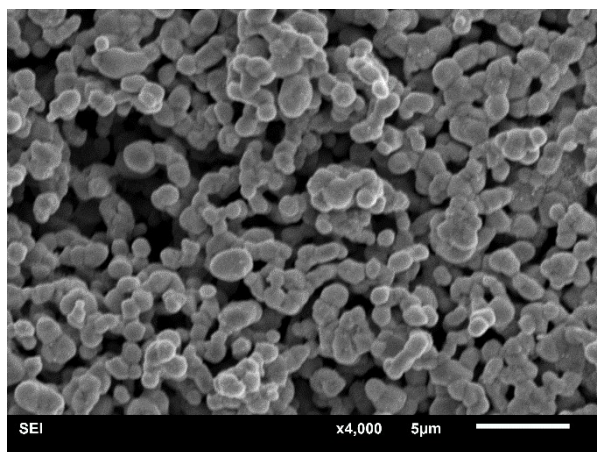

**Figure S1** SEM images of the AgBr nanoparticles.

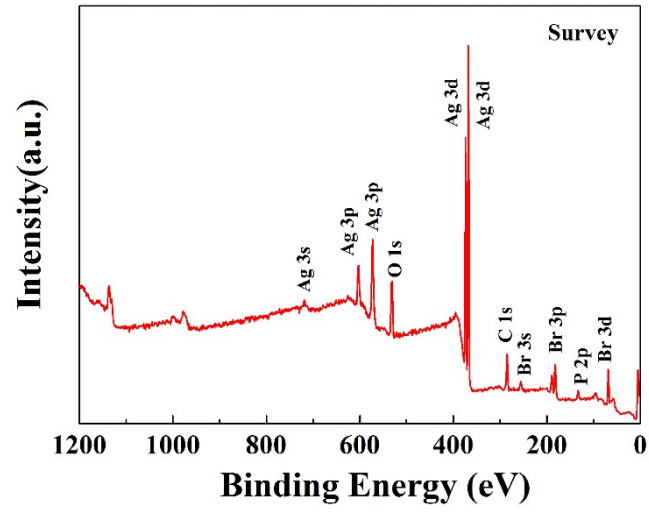

Figure S2 XPS survey spectrum of ABAP-48%
